# Supplementary material for: Well-defined nanomagnetic nitrilotriacetic acid complex of Cu(ii) supported on silica-coated nanosized magnetite: a new highly efficient and magnetically separable catalyst for C–N bond formation
Source: Royal Society of Chemistry journal article supplement (doi:10.1039/d4ra03675a), 2024-01-01
Supplement: d4ra03675a1.pdf [file d4ra03675a1.pdf]

## Supporting Information

### **Well-defined Nanomagnetic Nitrilotriacetic Acid Complex of Cu(II) Supported on the Silica-Coated Nanosized Magnetite: as A New Highly Efficient and Magnetically Separable Catalyst for C-N Bond Formation**

Kimiya Rajabzadeh<sup>a</sup>, Alir Reza Sardarian <sup>\*a</sup>

<sup>a</sup> Chemistry Department, College of Sciences, Shiraz University, Shiraz, 71946-84795, Iran

## Table of Contents

|                                                                   |         |
|-------------------------------------------------------------------|---------|
| Characterization data of products (3aa-3bb) .....                 | page S2 |
| References .....                                                  | page S6 |
| <sup>1</sup> H, <sup>13</sup> C, and IR spectra of products ..... | page S9 |

## **Characterization data of products (3aa-3bb)**

**1-Phenyl-1*H*-imidazole (3aa):** Dark brown oil [1]; IR (KBr)  $\bar{\nu}$  (cm<sup>-1</sup>): 3406 (NH), 1494 (C=C); <sup>1</sup>H NMR (250 MHz, DMSO-*d*<sub>6</sub>):  $\delta$  (ppm) = 8.26 (s, 1H), 7.74 (s, 1H), 7.66-7.62 (m, 2H), 7.54-7.47 (m, 2H), 7.37-7.31 (m, 1H), 7.10 (s, 1H); <sup>13</sup>C NMR (63 MHz, CDCl<sub>3</sub>):  $\delta$  = 118.2, 121.4, 127.5, 129.9, 130.4, 135.5, 137.4.

**1-(4-Nitrophenyl)-1*H*-imidazole (3ab):** Yellow solid; M.P. = 207-209 °C (207-209 °C [2]); IR (KBr)  $\bar{\nu}$  (cm<sup>-1</sup>): 3443, 2923, 1628, 1518, 1462, 1301, 829; <sup>1</sup>H NMR (250 MHz, CDCl<sub>3</sub>):  $\delta$  (ppm) = 8.46-8.21 (m, 2H), 7.93 (s, 1H), 7.55-7.49 (m, 2H), 7.22-7.20 (m, 2H); <sup>13</sup>C NMR (63 MHz, CDCl<sub>3</sub>):  $\delta$  = 117.7, 121.7, 125.2, 130.9, 136.3, 142.9, 147.0; Anal. Calcd for C<sub>9</sub>H<sub>7</sub>N<sub>3</sub>O<sub>2</sub>: C, 57.14; H, 3.73; N, 22.21%. Found: C, 57.1; H, 3.69; N, 22.30%.

**1-(4-Chlorophenyl)-1*H*-imidazole (3ac):** Light brown solid; M.P. = 83-85 °C (85-87 °C [1]); IR (KBr)  $\bar{\nu}$  (cm<sup>-1</sup>): 3409, 3112, 1713, 1604, 1504, 1303, 1054, 961, 754, 684; <sup>1</sup>H NMR (250 MHz, CDCl<sub>3</sub>):  $\delta$  (ppm) = 8.48-8.26 (m, 2H), 8.10-7.91 (m, 1H), 7.62-7.54 (m, 2H), 7.39-7.36 (m, 1H), 7.27-7.25 (m, 1H); Anal. Calcd for C<sub>9</sub>H<sub>7</sub>ClN<sub>2</sub>: C, 60.52; H, 3.95; N, 15.68%. Found: C, 60.48; H, 4.2; N, 15.49%.

**1-(Naphthalen-1-yl)-1*H*-imidazole (3ad):** Brown oil [3]; IR (KBr)  $\bar{\nu}$  (cm<sup>-1</sup>): 3056, 1631, 1577, 1442, 1136, 856, 801; <sup>1</sup>H NMR (300 MHz, CDCl<sub>3</sub>):  $\delta$  (ppm) = 7.95 (d, *J* = 6.0 Hz, 2H), 7.81 (s, 1H), 7.60-7.51 (m, 4H), 7.44 (d, *J* = 9.0 Hz, 1H), 7.32-7.18 (m, 2H); <sup>13</sup>C NMR (75 MHz, CDCl<sub>3</sub>):  $\delta$  (ppm) = 134.1, 133.9, 129.4, 129.2, 128.3, 127.7, 127.0, 125.2, 123.7, 122.2, 121.8.

**2-(1*H*-Imidazol-1-yl)pyridine (3ae):** Dark brown oil [1]; IR (KBr)  $\bar{\nu}$  (cm<sup>-1</sup>): 33369, 3059, 1682, 1594, 1478, 1156, 710, 654; <sup>1</sup>H NMR (400 MHz, CDCl<sub>3</sub>):  $\delta$  (ppm) = 8.55-8.27 (m, 2H), 7.81-7.76 (m, 1H), 7.66 (s, 1H), 7.34 (d, *J* = 8.0 Hz, 1H), 7.30-7.18 (m, 2H); <sup>13</sup>C NMR (101 MHz, CDCl<sub>3</sub>):  $\delta$  (ppm) = 149.1, 139.0, 135.0, 130.5, 122.0, 116.4, 112.3.

**1,4-Di(1*H*-imidazol-1-yl)benzene (3af):** Yellow solid; M.P. = 208-209 °C (208-210 °C [4]); IR (KBr)  $\bar{\nu}$  (cm<sup>-1</sup>): 3409, 1496; <sup>1</sup>H NMR (250 MHz, CDCl<sub>3</sub>):  $\delta$  (ppm) = 7.75 (s, 2H), 7.54-7.49 (m, 2H), 7.24-7.13 (m, 6H); Anal. Calcd for C<sub>12</sub>H<sub>10</sub>N<sub>4</sub>: C, 68.56; H, 4.79; N, 26.65%. Found: C, 68.52; H, 4.52; N, 26.42%.

**2-Methyl-1-phenyl-1H-imidazole (3ag):** Yellow oil [5]; <sup>1</sup>H NMR (300 MHz, CDCl<sub>3</sub>): δ (ppm) = 7.63-7.54(m, 2H), 7.46-7.37(m, 3H), 7.27-7.24 (m, 2H), 2.01 (s, 3H); <sup>13</sup>C NMR (63 MHz, CDCl<sub>3</sub>): δ = 13.7, 120.6, 125.5, 127.5, 128.2, 129.5, 137.8, 144.6.

**2-Methyl-1-(4-nitrophenyl)-1H-imidazole(3ah):** Yellow solid; M.P.= 128-130 °C (128-130 °C [6]); IR (KBr)  $\bar{\nu}$  (cm<sup>-1</sup>): 2916, 2848, 1695, 1501, 1417, 1339, 1175, 739, 696; <sup>1</sup>H NMR (300 MHz, CDCl<sub>3</sub>): δ (ppm) = 8.37 (d, *J* = 9.0 Hz, 2H), 7.51 (d, *J* = 9.0 Hz, 2H), 7.09 (s, 2H), 2.45 (s, 3H); <sup>13</sup>C NMR (75 MHz, CDCl<sub>3</sub>): δ (ppm) = 146.9, 144.5, 143.0, 128.5, 125.8, 125.2, 120.3, 14.1; Anal. Calcd for C<sub>10</sub>H<sub>9</sub>N<sub>3</sub>O<sub>2</sub>: C, 59.11; H, 4.46; N, 20.68%. Found: C, 58.9; H, 4.5; N, 20.72%.

**2-(2-Methyl-1H-imidazol-1-yl)pyridine (3ai):** Yellow oil; IR (KBr)  $\bar{\nu}$  (cm<sup>-1</sup>): 3365, 3113, 2930, 1671, 1529, 1473, 1377, 1185, 740, 679; <sup>1</sup>H NMR (300 MHz, CDCl<sub>3</sub>): δ (ppm) = 8.59-8.57 (m, 1H), 7.91-7.85 (m, 1H), 7.37-7.31 (m, 3H), 7.07 (d, *J* = 7.5 Hz, 1H), 2.64 (s, 3H); <sup>13</sup>C NMR (75 MHz, CDCl<sub>3</sub>): δ (ppm) = 150.3, 149.3, 144.9, 138.8, 127.0, 122.7, 119.1, 117.3, 15.1.

**1-(4-Nitrophenyl)-1H-benzo[d]imidazole (3aj):** Yellow solid, M.P. > 300 °C (> 300 °C [7]); IR (KBr)  $\bar{\nu}$  (cm<sup>-1</sup>): 1503, 1352, 867, 858, 731; <sup>1</sup>H NMR (250 MHz, DMSO-*d*<sub>6</sub>): δ (ppm) = 8.72 (s, 1H), 8.46-8.40 (m, 2H), 8.04-7.98 (m, 2H), 7.81-7.74 (m, 2H), 7.41-7.30 (m, 2H); Anal. Calcd for C<sub>13</sub>H<sub>9</sub>N<sub>3</sub>O<sub>2</sub>: C, 65.27; H, 3.79; N, 17.56%. Found: C, 65.33; H, 3.62; N, 17.08%.

**1-(*p*-Tolyl)-1H-benzo[d]imidazole (3ak):** Yellow solid, M.P.> 300 °C, IR (KBr)  $\bar{\nu}$  (cm<sup>-1</sup>): 3390, 2919, 2858, 1609, 1516, 1453, 1375, 1155, 819; <sup>1</sup>H NMR (300 MHz, CDCl<sub>3</sub>): δ (ppm) = 8.16 (s, 1H), 7.91 (s, 1H), 7.53-7.29 (m, 7H), 2.47 (s, 3H); <sup>13</sup>C NMR (75 MHz, CDCl<sub>3</sub>): δ (ppm) = 143.7, 142.4, 138.2, 133.7, 130.6, 124.0, 123.7, 122.8, 120.4, 110.6, 21.2; Anal. Calcd for C<sub>14</sub>H<sub>12</sub>N<sub>2</sub>: C, 80.74; H, 5.81; N, 13.45%. Found: C, 80.71; H, 5.82; N, 13.47%.

**1-(4-Methoxyphenyl)-1H-benzo[d]imidazole (3al):** Yellow solid; M.P.= 96-98 °C (96-97 °C [8]); IR (KBr)  $\bar{\nu}$  (cm<sup>-1</sup>): 3448, 2927, 2800, 1613, 1515, 1458, 1334, 1247, 1177, 833; <sup>1</sup>H NMR (250 MHz, CDCl<sub>3</sub>): δ (ppm) = 8.06 (s, 1H), 7.89-7.86 (m, 1H), 7.54-7.42 (m, 2H), 7.42-7.36 (m, 1H), 7.34-7.26 (m, 2H), 7.10-7.06 (m, 2H), 3.89 (s, 3H), <sup>13</sup>C NMR (101 MHz, CDCl<sub>3</sub>): δ (ppm) = 158.3, 136.3, 132.9, 129.0, 128.3,

126.0, 122.2, 121.1, 120.1, 114.8, 110.4, 102.9, 55.6; Anal. Calcd for C<sub>14</sub>H<sub>12</sub>N<sub>2</sub>O: C, 74.98; H, 5.39; N, 12.49%. Found: C, 74.89; H, 5.25; N, 12.68%.

**1-Phenyl-1*H*-indole (3am):** Colorless oil [9]; IR (KBr)  $\bar{\nu}$  (cm<sup>-1</sup>): 694, 748, 1018, 1027, 1134, 1227, 1327, 1458, 1504, 1596, 2923, 3055; <sup>1</sup>H NMR (250 MHz, CDCl<sub>3</sub>):  $\delta$  (ppm) = 7.77-7.68 (m, 1H), 7.62-7.58 (m, 1H), 7.56-7.50 (m, 4H), 7.43-7.34 (m, 2H), 7.26-7.22 (m, 2H), 6.74-6.69 (m, 1H); <sup>13</sup>C NMR (63 MHz, CDCl<sub>3</sub>):  $\delta$  = 103.6, 110.5, 120.4, 121.1, 122.4, 124.4, 126.4, 128.0, 129.3, 129.6, 135.8, 139.8.

**1-(4-Nitrophenyl)-1*H*-indole (3an):** Yellow solid; M.P.= 131-133 °C (131-132 °C [10]); IR (KBr)  $\bar{\nu}$  (cm<sup>-1</sup>): 1641, 1594, 1566, 1505, 1456, 1326, 1137, 1069, 953, 854; <sup>1</sup>H NMR (250 MHz, CDCl<sub>3</sub>):  $\delta$  (ppm)= 7.61-7.58 (m, 1H), 7.44-7.31 (m, 5H), 7.20-7.06 (m, 3H), 6.61-6.59 (m, 1H); Anal. Calcd for C<sub>14</sub>H<sub>10</sub>N<sub>2</sub>O<sub>2</sub>: C, 70.58; H, 4.23; N, 11.76%. Found: C, 69.84; H, 4.22; N, 11.53%.

**1-(*p*-Tolyl)-1*H*-indole (3ao):** Yellow solid; M.P.= 38-40 °C (38-39 °C [11]); IR (KBr)  $\bar{\nu}$  (cm<sup>-1</sup>): 2921, 1608, 1519, 1457, 1333, 1213, 821, 740; <sup>1</sup>H NMR (250 MHz, CDCl<sub>3</sub>):  $\delta$  (ppm) = 7.63-7.56 (m, 1H), 7.49-7.41 (m, 1H), 7.32-7.27 (m, 2H), 7.23-7.19 (m, 3H), 7.16-7.03 (m, 2H), 6.60-6.55 (m, 1H), 2.34 (s, 3H); <sup>13</sup>C NMR (63 MHz, CDCl<sub>3</sub>):  $\delta$ = 21.1, 103.2, 110.5, 120.1, 121.1, 122.2, 124.3, 128.1, 129.2, 130.1, 136.3, 137.3; Anal. Calcd for C<sub>15</sub>H<sub>13</sub>N: C, 86.92; H, 6.32; N, 6.76%. Found: C, 86.56; H, 6.54; N, 6.9%.

**1-(4-Methoxyphenyl)-1*H*-indole (3ap):** Yellow solid; M.P.= 56-59 °C (56-58 °C [12]); IR (KBr)  $\bar{\nu}$  (cm<sup>-1</sup>): 3445, 2929, 2839, 1612, 1516, 1457, 1287, 1251, 1179, 835; <sup>1</sup>H NMR (250 MHz, CDCl<sub>3</sub>):  $\delta$  (ppm) = 8.06 (s, 1H), 7.95-7.81 (m, 1H), 7.54-7.38 (m, 3H), 7.36-7.26 (m, 2H), 7.15-7.03 (m, 2H), 3.90 (s, 3H); <sup>13</sup>C NMR (101 MHz, CDCl<sub>3</sub>):  $\delta$  (ppm) = 159.4, 143.8, 142.6, 134.2, 129.1, 125.7, 123.6, 122.6, 120.5, 115.1, 110.4, 55.7; Anal. Calcd for C<sub>15</sub>H<sub>13</sub>NO: C, 80.69; H, 5.87; N, 6.27%. Found: C, 80.35; H, 5.89; N, 6.3%.

**10-Phenyl-10*H*-phenothiazine (3aq):** Dark brown solid; M.P.= 90-92 °C (90-91°C [13]); IR (KBr)  $\bar{\nu}$  (cm<sup>-1</sup>): 434, 529, 625, 707, 744, 931, 1041, 1128, 1243, 1305, 1457, 1585, 2924, 3057; <sup>1</sup>H NMR (250 MHz, CDCl<sub>3</sub>):  $\delta$  (ppm) = 8.30-8.26 (m, 1H), 8.15-8.02 (m, 2H), 7.97-7.91 (m, 1H), 7.76-7.54 (m, 5H), 7.51-7.27 (m, 4H), 6.77-6.72 (m, 1H); Anal. Calcd for C<sub>18</sub>H<sub>13</sub>NS: C, 78.51; H, 4.76; N, 5.09%. Found: C, 78.62; H, 4.83; N, 4.73%.

**10-(4-Nitrophenyl)-10H-phenothiazine (3ar):** Yellow solid; M.P.= 156-158 °C (156-157 °C [14]); <sup>1</sup>H NMR (250 MHz, CDCl<sub>3</sub>): δ (ppm) = 7.42 (d, *J* = 7.5 Hz, 1H), 7.31-7.26 (m, 1H), 7.05-6.99 (m, 1H), 6.91-6.74 (m, 2H), 6.22 (d, *J* = 7.5 Hz, 1H) Anal. Calcd for C<sub>18</sub>H<sub>12</sub>N<sub>2</sub>O<sub>2</sub>S: C, 67.48; H, 3.78; N, 8.74%. Found: C, 67.23; H, 3.11; N, 8.61%.

**10-(4-Chlorophenyl)-10H-phenothiazine(7s):** White solid; M.P.= 120-122 °C (120-121°C [14]); IR (KBr)  $\bar{\nu}$  (cm<sup>-1</sup>): 3448, 2923, 1625, 1462, 1090, 913; <sup>1</sup>H NMR (250 MHz, CDCl<sub>3</sub>): δ (ppm) = 7.60-7.47(m, 1H), 7.42-7.32 (m, 1H), 7.00-6.88 (m, 1H), 6.82-6.68 (m, 2H), 6.18-6.06 (m, 1H); <sup>13</sup>C NMR (101 MHz, CDCl<sub>3</sub>): δ (ppm) = 143.9, 139.6, 133.8, 132.4, 131.0, 126.9, 126.3, 122.9, 120.9, 116.3; Anal. Calcd for C<sub>18</sub>H<sub>12</sub>ClNS: C, 69.78; H, 3.90; N, 4.52%. Found: C, 69.74; H, 3.92; N, 4.51%.

**1-Phenylpiperidine (3at):** Yellow oil[15]; IR (KBr)  $\bar{\nu}$  (cm<sup>-1</sup>): 3448, 2923, 1625, 1462, 1090, 913; <sup>1</sup>H NMR (250 MHz, CDCl<sub>3</sub>): δ (ppm) = 7.22-7.17 (m, 2H), 6.68-6.61 (m, 3H), 2.97 (t, *J*=5.0 Hz, 5H), 1.61-1.52 (m, 4H), 1.49-1.44 (m, 1H).

**1-(4-Nitrophenyl)piperidine (3au):** Yellow oil ( [16]); IR (KBr)  $\bar{\nu}$  (cm<sup>-1</sup>): 2939, 1601, 1514, 1477, 1326, 1114, 821; <sup>1</sup>H NMR (250 MHz, CDCl<sub>3</sub>): δ (ppm) = 8.15-8.05 (m, 2H), 6.82-6.85 (m, 2H), 3.46 (s, 4H), 1.69 (s, 6H) ; <sup>13</sup>C NMR (101 MHz, CDCl<sub>3</sub>): δ (ppm) = 154.9, 137.3, 126.1, 112.3, 48.4, 25.3, 24.2.

**1,4-Di(piperidin-1-yl)benzene (3av):** Yellow solid; M.P.= 104-106 °C (104-106 °C [16]); IR (KBr)  $\bar{\nu}$  (cm<sup>-1</sup>): 3338, 2921, 1598, 1462, 1180, 699, 721; <sup>1</sup>H NMR (250 MHz, CDCl<sub>3</sub>): δ (ppm) = 7.19-7.14 (m, 2H), 6.65-6.59 (m, 2H), 2.95 (t, 5Hz, 8H), 1.64-1.31 (m, 12H); Anal. Calcd for C<sub>16</sub>H<sub>24</sub>N<sub>2</sub>: C, 78.64; H, 9.90; N, 11.46%. Found: C, 78.36; H, 10.4; N, 11.13%.

**1,4-Diphenylpiperazine (3aw):** Yellow solid; M.P. = 150-152 °C (150-153 °C [17]); IR (KBr)  $\bar{\nu}$  (cm<sup>-1</sup>): 2829, 1597, 1429, 1454, 1389, 1324, 1223, 1154, 1031, 984, 924, 765, 691, 527; <sup>1</sup>H NMR (300 MHz, CDCl<sub>3</sub>): δ (ppm) = 7.38-7.33 (m,4H), 7.19 (s,6H), 3.40-3.14 (m,8H); <sup>13</sup>C NMR (75 MHz, CDCl<sub>3</sub>): δ (ppm) = 160.7, 129.7, 123.6, 118.2, 44.6; Anal. Calcd for C<sub>16</sub>H<sub>18</sub>N<sub>2</sub>: C, 80.63; H, 7.61; N, 11.75%. Found: C, 80.59; H, 7.64; N, 11.78%.

**4-(4-Nitrophenyl)morpholine (3ax):** Yellow solid; M.P.= 147-150 °C (147-149 °C [18]); IR (KBr)  $\bar{\nu}$ (cm<sup>-1</sup>): 2935, 1657, 1590, 1452, 1322, 1151, 843; <sup>1</sup>H NMR (250 MHz, CDCl<sub>3</sub>):  $\delta$  (ppm) = 8.28-8.05 (m, 2H), 6.87-6.80 (m, 2H), 3.91-3.83 (m, 4H), 3.37 (t,  $J$ = 5.0 Hz, 4H); <sup>13</sup>C NMR (101 MHz, CDCl<sub>3</sub>):  $\delta$  (ppm) = 154.9, 137.3, 126.1, 112.3, 48.4, 25.3; Anal. Calcd for C<sub>10</sub>H<sub>12</sub>N<sub>2</sub>O<sub>3</sub>: C, 57.69; H, 5.81; N, 13.45%. Found: C, 57.61; H, 5.93; N, 13.51%.

**1,4-Dimorpholinobenzene (3ay):** White solid; M.P.= 191-193 °C (191-192 °C [19]); IR (KBr)  $\bar{\nu}$  (cm<sup>-1</sup>): 1583, 1511, 1296, 1114, 857; <sup>1</sup>H NMR (250 MHz, CDCl<sub>3</sub>):  $\delta$  (ppm) = 7.19-7.14 (m, 2H), 6.65-6.60 (m, 2H), 2.95 (t,  $J$ = 5.0 Hz, 8H), 1.56-1.42 (m, 8H); Anal. Calcd for C<sub>14</sub>H<sub>20</sub>N<sub>2</sub>O<sub>2</sub>: C, 67.72; H, 8.12; N, 11.28%. Found: C, 68.02; H, 7.83; N, 11.41%.

***N,N*-Dimethylaniline (3az):** Colorless liquid [20]; <sup>1</sup>H NMR (400 MHz, CDCl<sub>3</sub>):  $\delta$  (ppm) = 7.44 (dd,  $J$ = 8.0 Hz, 2H), 6.93 (t,  $J$ = 8.0, 3H), 3.11(s, 6H); <sup>13</sup>C NMR (101 MHz, CDCl<sub>3</sub>):  $\delta$  (ppm) = 150.8, 129.2, 116.7, 112.8, 40.7.

***N,N*-Dimethyl-4-nitroaniline (3ba):** Yellow solid; M.P.= 162-164 °C (162-163 °C [21]); IR (KBr)  $\bar{\nu}$  (cm<sup>-1</sup>): 3086, 2833, 1911, 1603, 1591, 1584, 1536, 1454, 823, 755; <sup>1</sup>H NMR (400 MHz, DMSO-*d*<sub>6</sub>):  $\delta$  (ppm) = 8.05 (d,  $J$  = 9.3 Hz, 1H), 6.76 (d,  $J$  = 9.5 Hz, 1H), 3.09 (s, 3H); <sup>13</sup>C NMR (101 MHz, DMSO-*d*<sub>6</sub>):  $\delta$  (ppm) = 154.3, 135.5, 125.7, 110.6, 30.6; Anal. Calcd for C<sub>8</sub>H<sub>10</sub>N<sub>2</sub>O<sub>2</sub>: C, 57.82; H, 6.07; N, 16.86%. Found: C, 57.82; H, 6.13; N, 16.54%.

***N,N*-Diethylaniline (3bb):** Yellow oil [1]; <sup>1</sup>H NMR (400 MHz, CDCl<sub>3</sub>):  $\delta$  (ppm) = 7.41-7.31 (m, 2H), 6.84- 6.77 (m, 3H), 3.48 (q,  $J$ = 8.0 Hz, 4H), 1.30 (t,  $J$ = 8.0, 6H); <sup>13</sup>C NMR (101 MHz, CDCl<sub>3</sub>):  $\delta$  (ppm) = 148.0, 129.4, 115.5, 112.0, 44.4, 12.7.

## References

1. Sharghi, H.; Sepehri, S.; Aberi, M. Cu(II) Complex of Pyridine-Based Polydentate as a Novel, efficient, and Highly Reusable Catalyst in C–N Bond-Forming Reaction. *Mol. Divers.* **2017**, 21, 855-864.

2. Inaloo, I. D.; Majnooni, S.; Eslahi, H.; Esmaeilpour, M. *N*-Arylation of (Hetero)Arylamines Using Aryl Sulfamates and Carbamates Via C–O Bond Activation Enabled by a Reusable and Durable Nickel(0) Catalyst†. *New. J. Chem.* **2020**, 44, 13266-13278.
3. Altman, R. A.; Buchwald, S. L. 4,7-Dimethoxy-1,10-Phenanthroline: An Excellent Ligand for the Cu-Catalyzed *N*-Arylation of Imidazoles. *Org. Lett.* **2006**, 8, 2779-2782.
4. Tronnier, A.; Strassner, Th. (C<sup>+</sup>C\*) Cyclometalated Binuclear *N*-Heterocyclic Biscarbene Platinum(II) Complexes – Highly Emissive Phosphorescent Emitters†. *Dalton. Trans.* **2013**, 42, 9847-9851.
5. Molaei, H.; Ghanbari, M. M. Practical Copper-Catalyzed *N*-Arylation of Amines with 20% Aqueous Solution of *N*-Bu<sub>4</sub>NOH. *Chin. Chem. Lett.* **2012**, 23, 301-304.
6. Zhou, Q.; Du, F.; Chen, Y.; Fu, Y.; Sun, W.; Wu, Y.; Chen, G. 1-(–)-Quebrachitol as a Ligand for Selective Copper(0)-Catalyzed *N*-Arylation of Nitrogen-Containing Heterocycles. *J. Org. Chem.* **2019**, 84, 8160-8167.
7. Wang, Y.; Wu, Z.; Wang, L.; Li, Z.; Zhou, X. A Simple and Efficient Catalytic System for *N*-Arylation of Imidazoles in Water. *Chem. Eur. J.* **2009**, 15, 18971-18974.
8. Liu, X.; Chang, S.; Chen, X.; Ge, X.; Qian, C. Efficient Ullmann C–X Coupling Reaction Catalyzed by a Recoverable Functionalized-Chitosan Supported Copper Complex. *New J. Chem.* **2018**, 42, 16013-16020.
9. Xiao, R.; Zhao, H.; Cai, M. MCM-41-Immobilized Bidentate Nitrogen Copper(I) Complex: A Highly Efficient and Recyclable Catalyst for Buchwald *N*-Arylation of Indoles. *Tetrahedron.* **2013**, 69, 5444-5450.
10. Nandi, D.; Siwal, S.; Mallick, K. A Carbon Nitride Supported Copper Nanoparticle Composite: A Heterogeneous Catalyst for the *N*-Arylation of Hetero-Aromatic Compounds†. *New. J. Chem.* **2017**, 41, 3082-3088.
11. Maligres, P. E.; Krska, S. W.; Dormer, P. G. A Soluble Copper(I) Source and Stable Salts of Volatile Ligands for Copper-Catalyzed C–X Couplings. *J. Org. Chem.* **2012**, 77, 7646-7651.

12. Ge, X.; Chen, X.; Qian, C.; Zhou, S. Efficient Ullmann C–N Coupling Catalyzed by a Recoverable Oligose-Supported Copper Complex†. *RSC. Adv.* **2016**, 6, 58898-58906.
13. Zhang, L.; Huang, X.; Zhen, S.; Zhao, J.; Li, H.; Yuan, B.; Yang, G. Pd-Catalyzed Double N-Arylation of Primary Amines to Synthesize Phenoxazines And Phenothiazines. *Org. Biomol. Chem.* **2017**, 15, 6306-6309.
14. Clarke, D.; Gilbert, B. C.; Hanson, P. Substituent Effects on the Distribution of the Spin Density in 10-Arylphenoxazine and 10-Arylphenothiazine Cation Radicals. *J. chem. soc Perkin Trans.* **1976**, 2, 114-124.
15. Hie, L.; Ramgren, S. D.; Mesganaw, T.; Garg, N. K.; Nickel-Catalyzed Amination of Aryl Sulfamates and Carbamates Using an Air-Stable Precatalyst. *Org. Lett.* **2012**, 14, 4182-4185.
16. Buch-Rasmussen, Th. Preparation and Properties of *N, N, N', N'*-Tetrasubstituted 1,4-Benzenediamines. *Acta. Chem. Scand.* **1996**, 50, 1013-1019.
17. Sharghi, H.; Shiri, P. 2-Phenyl-2-(4-phenyl-1H-1,2,3-triazol-1-yl)ethanol as an Efficient and Versatile Auxiliary Ligand in Copper(II)-Catalyzed Buchwald–Hartwig and Sharpless–Meldal C–N Bond-Forming Reactions. *Synthesis.* **2015**, 47, 1131-1146.
18. Pilkington, L. I.; Sparrow, K.; Rees, S. W.; Paulin, E. K.; van Rensburg, M.; Xu, C. S.; Barker, D. Development, Synthesis and Biological Investigation of a Novel Class of Potent PC-PLC Inhibitors, *Eur. J. Med. Chem.* **2020**, 191, 112162.
19. Chen, C.; Yang, L. M. Ni(II)–( $\sigma$ -Aryl) Complex: A Facile, Efficient Catalyst for Nickel-Catalyzed Carbon–Nitrogen Coupling Reactions. *J. Org. Chem.* **2007**, 72, 6324-6327.
20. Dupuy, S.; Steven P. N. Gold(I)-Catalyzed Protodecarboxylation of (Hetero)Aromatic Carboxylic Acids. *Chem. Eur. J.* **2013**, 19, 14034-14038.
21. Dutov, M. D.; Serushkina, O. V. Interaction of Hexamethylphosphoric Triamide with *m*-Dinitrobenzenes. *Mendeleev. Commun.* **2013**, 23, 174-175.



## $^1\text{H}$ , $^{13}\text{C}$ , and IR spectra of products

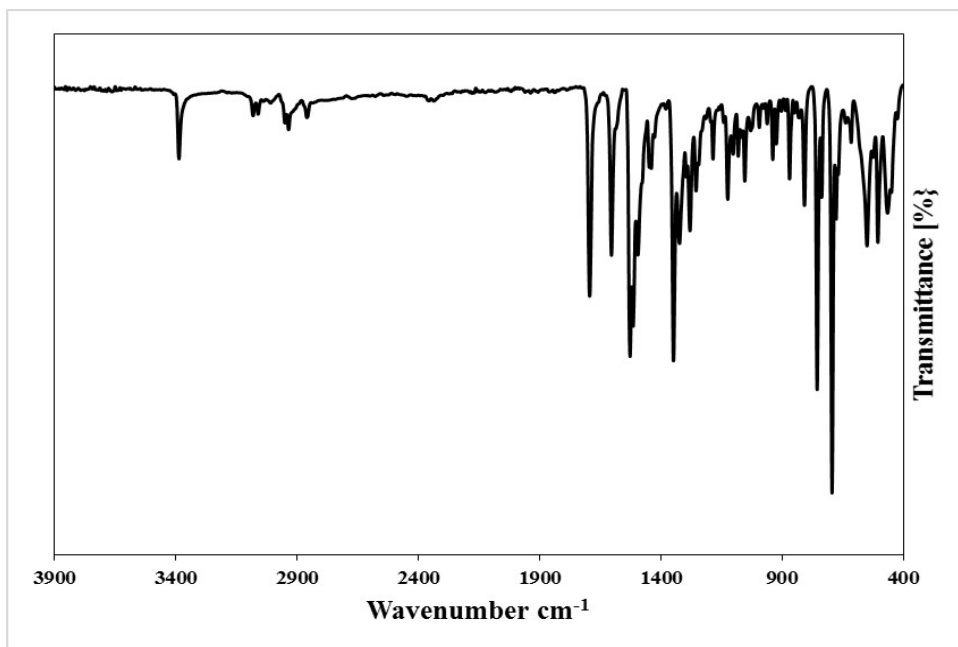

**Figure 1.** IR spectrum of *anti*-2-((3-nitrophenyl) (phenylamino) methyl) cyclohexan-1-one in KBr.

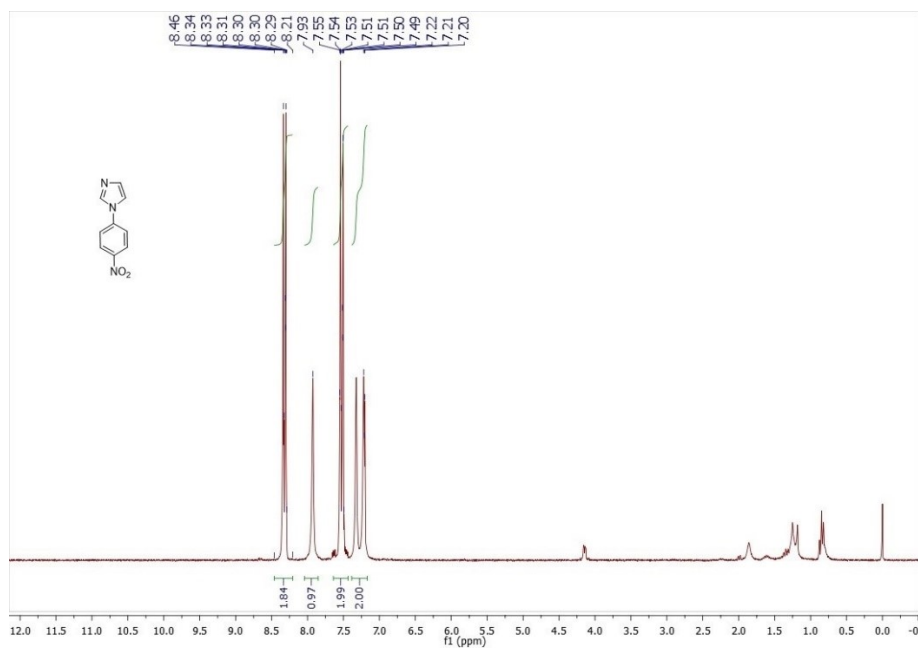

**Figure 2.**  $^1\text{H}$  NMR spectrum (250 MHz) of 1-(4-nitrophenyl)-1*H*-imidazole in  $\text{CDCl}_3$ .

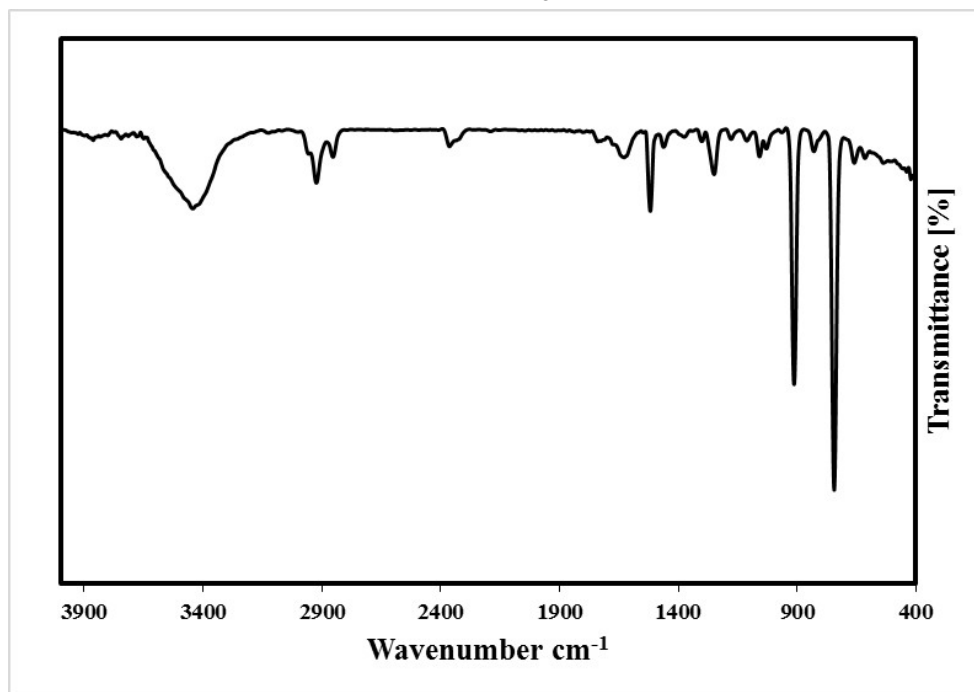

**Figure 3.** IR spectrum of 1-(4-nitrophenyl)-1*H*-imidazole in KBr.

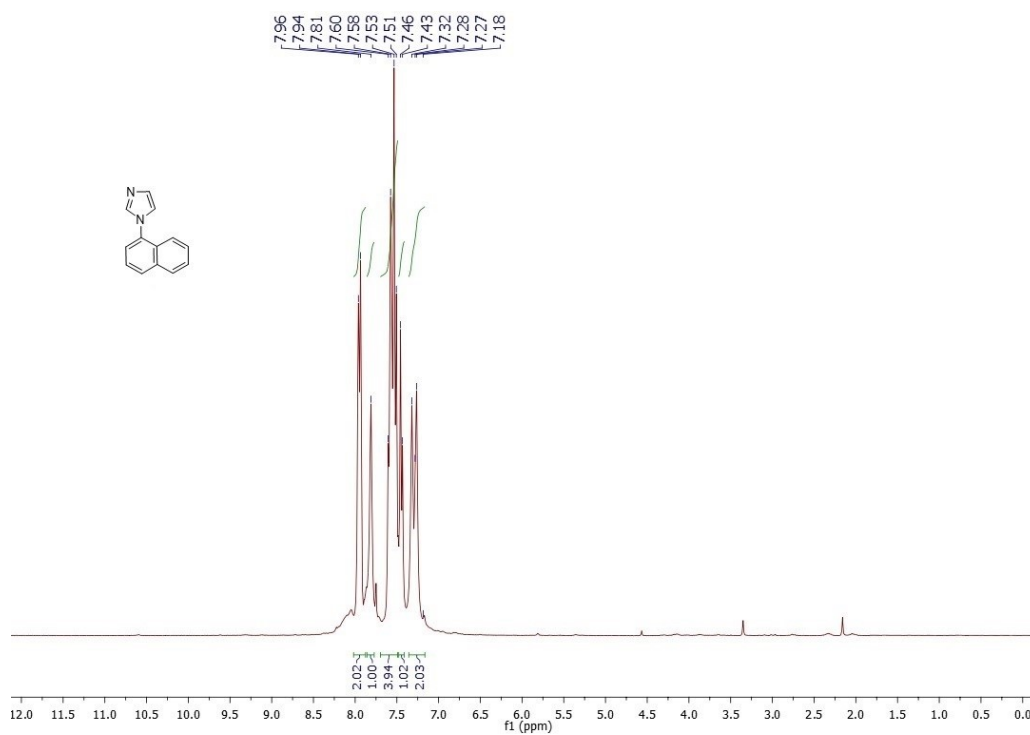

**Figure 4.**  $^1\text{H}$  NMR spectrum (300 MHz) of 1-(naphthalen-1-yl)-1*H*-imidazole in  $\text{CDCl}_3$ .

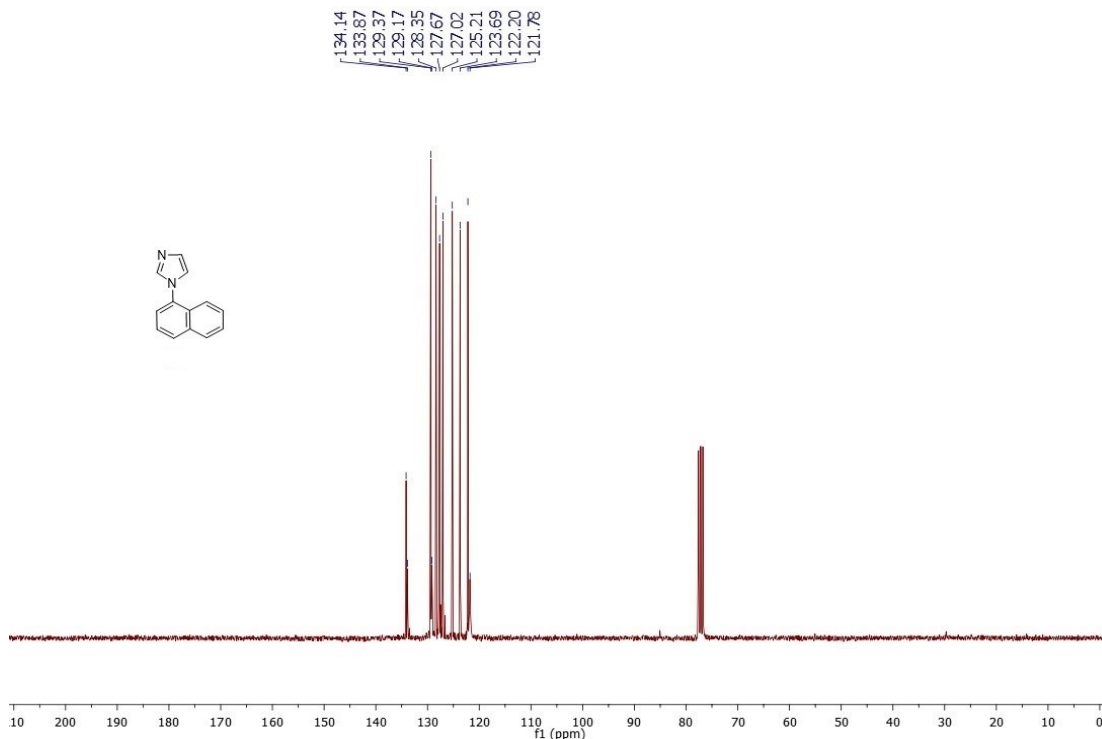

**Figure 5.**  $^{13}\text{C}$  NMR spectrum (75 MHz) of 1-(naphthalen-1-yl)-1*H*-imidazole in  $\text{DMSO}-d_6$ .

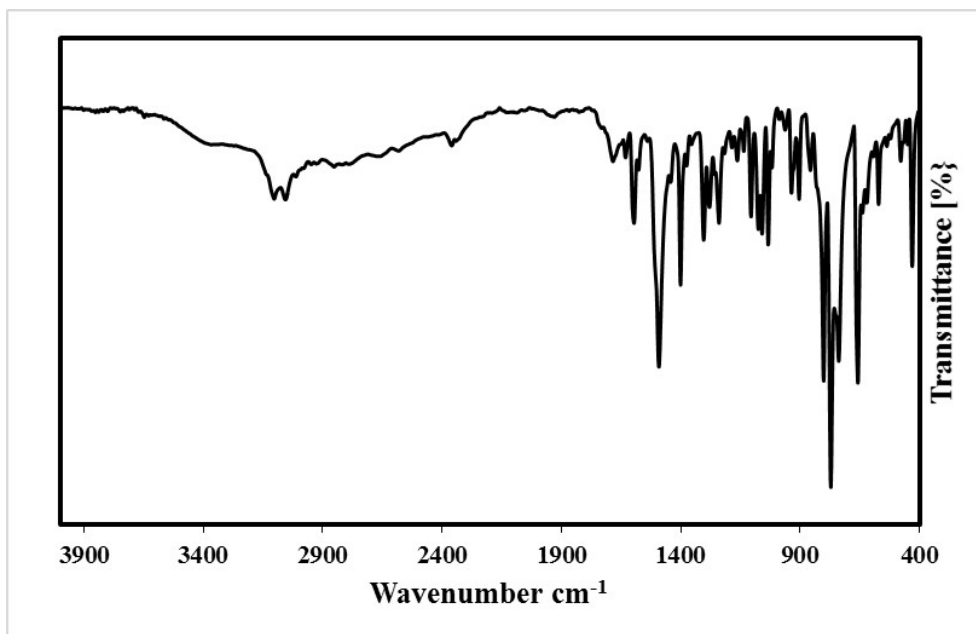

**Figure 6.** IR spectrum of 1-(naphthalen-1-yl)-1*H*-imidazole in KBr.

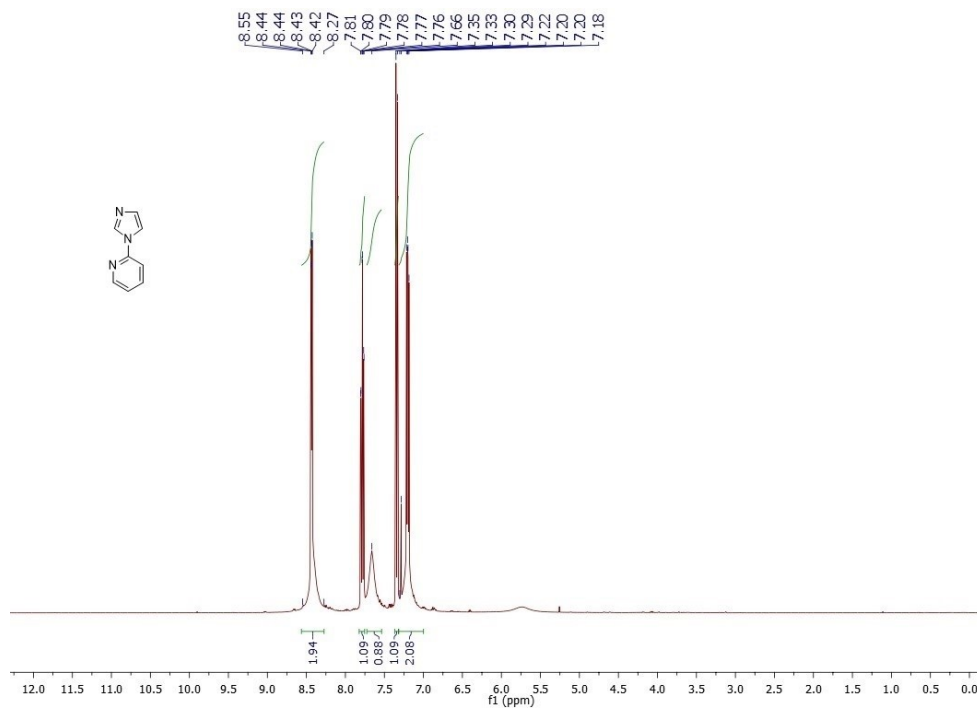

**Figure 7.**  $^1\text{H}$  NMR spectrum (400 MHz) of 2-(1*H*-imidazol-1-yl)pyridine in  $\text{CDCl}_3$ .

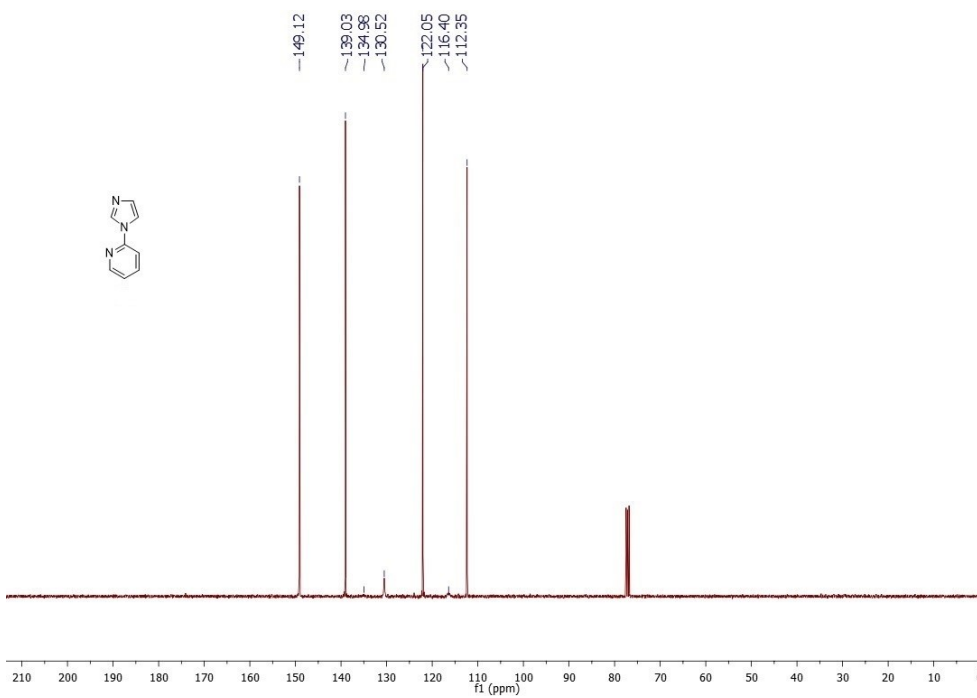

**Figure 8.**  $^{13}\text{C}$  NMR spectrum (101 MHz) of 2-(1*H*-imidazol-1-yl) pyridine in  $\text{CDCl}_3$ .

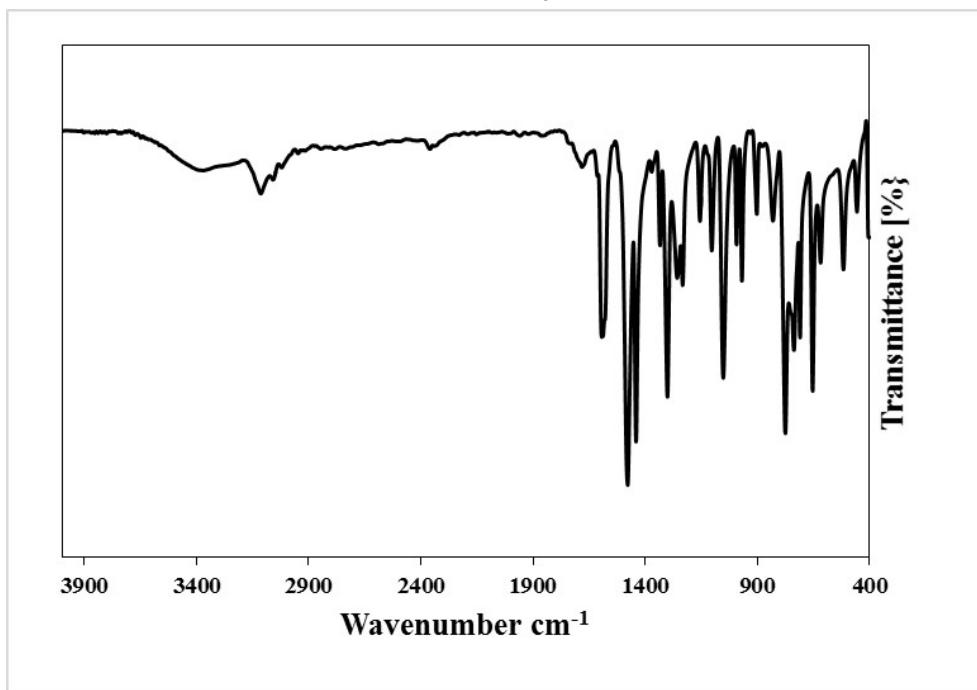

**Figure 9.** IR spectrum of 2-(1*H*-imidazol-1-yl)pyridine in KBr.

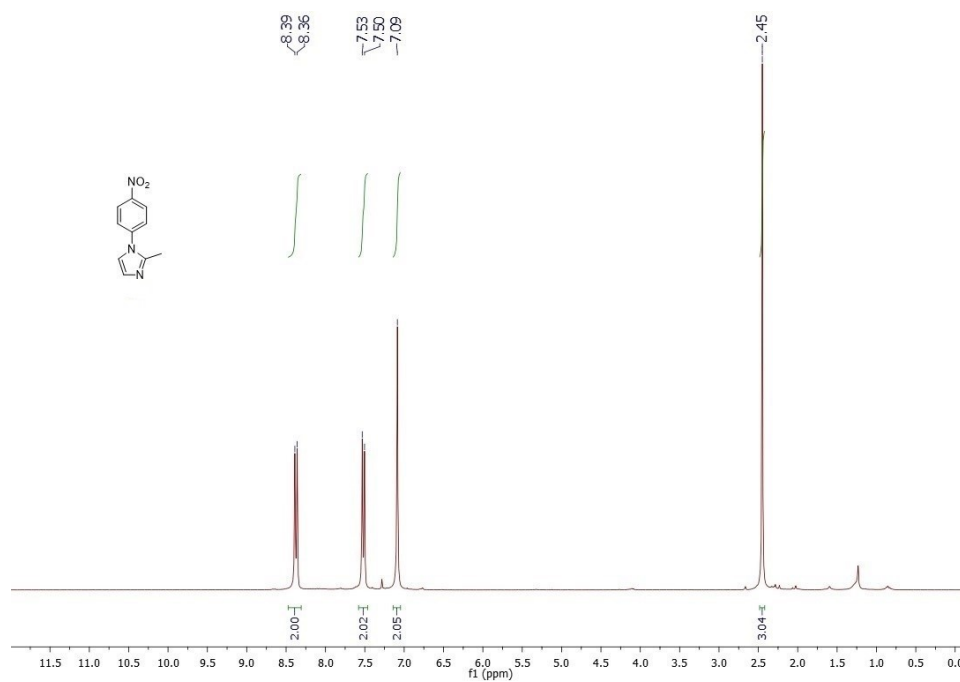

**Figure 10.**  $^1\text{H}$  NMR spectrum (300 MHz) of 2-methyl-1-(4-nitrophenyl)-1*H*-imidazole in  $\text{CDCl}_3$ .

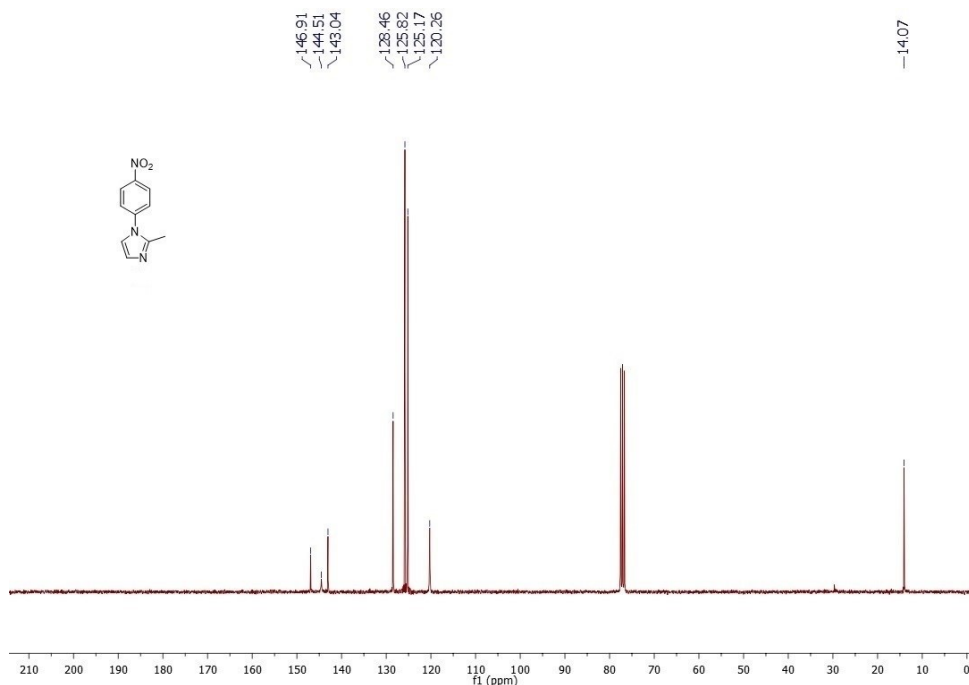

**Figure 11.**  $^{13}\text{C}$  NMR spectrum (75 MHz) of 2-methyl-1-(4-nitrophenyl)-1*H*-imidazole in  $\text{CDCl}_3$ .

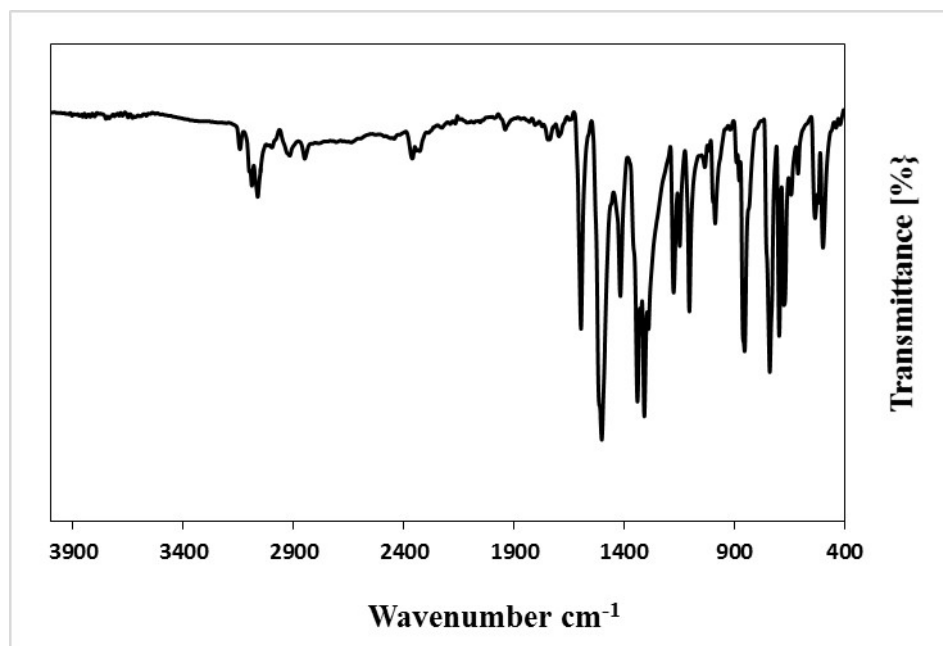

**Figure 12.** IR spectrum of 2-methyl-1-(4-nitrophenyl)-1*H*-imidazole in KBr.

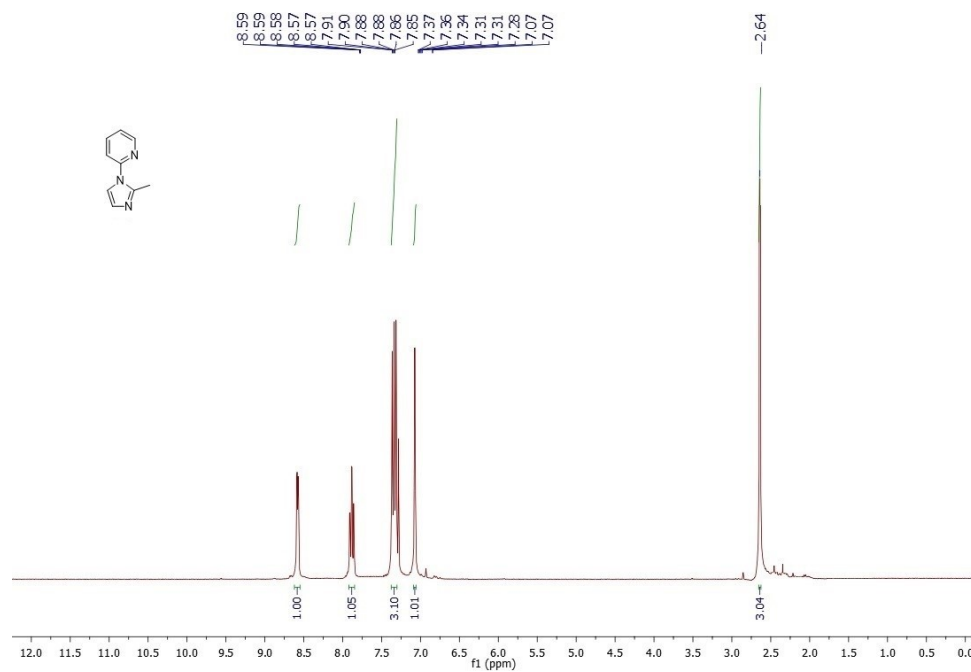

**Figure 13.** <sup>1</sup>H NMR spectrum (75 MHz) of 2-(2-methyl-1*H*-imidazol-1-yl)pyridine in CDCl<sub>3</sub>.

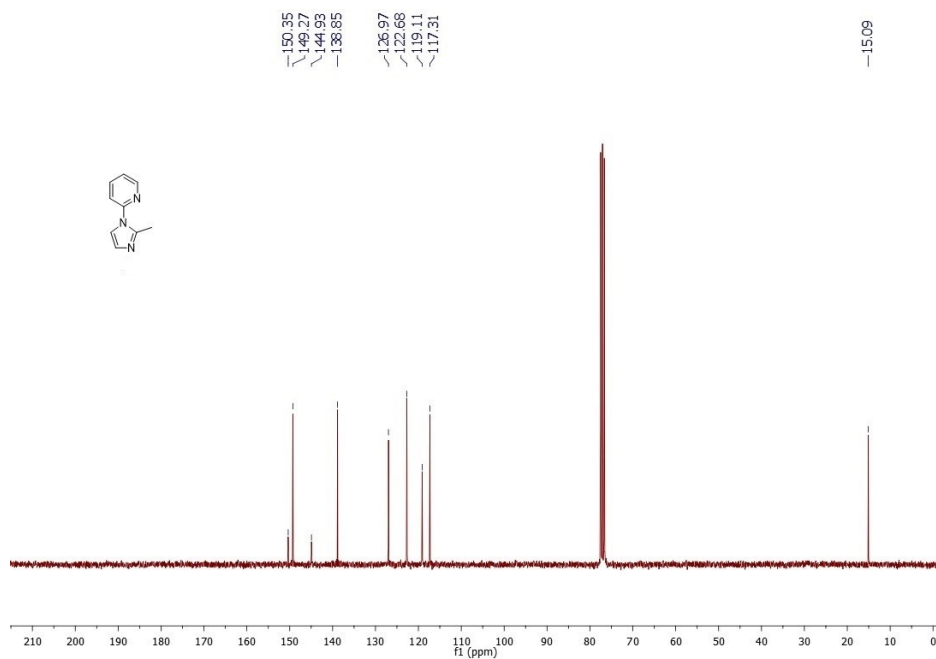

**Figure 14.**  $^{13}\text{C}$  NMR spectrum (75 MHz) of 2-(2-methyl-1*H*-imidazol-1-yl)pyridine in  $\text{CDCl}_3$ .

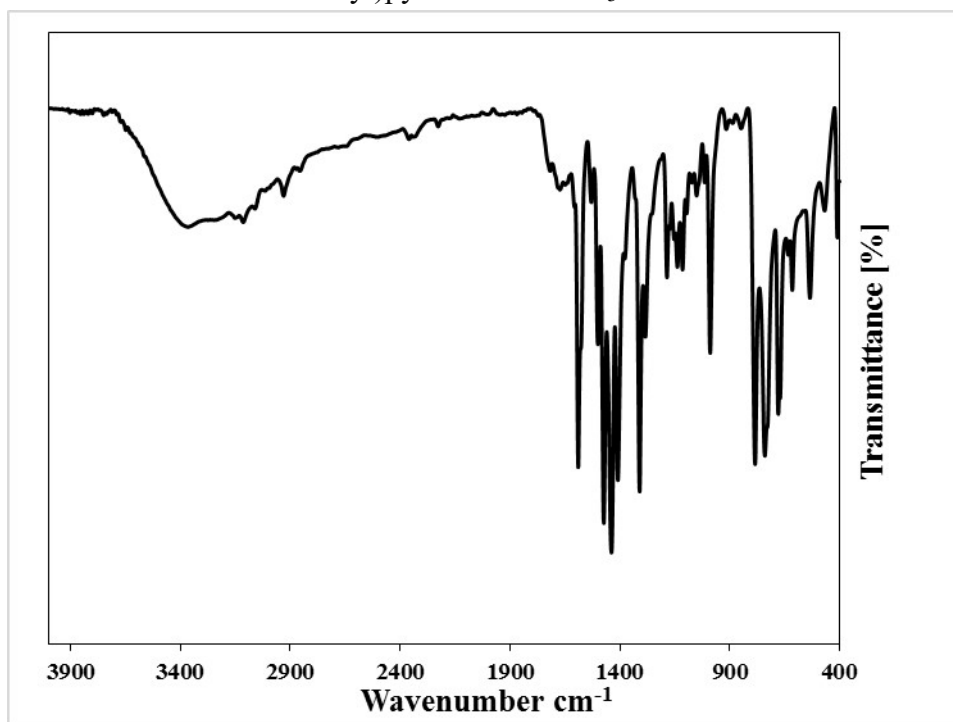

**Figure 15.** IR spectrum of 2-(2-methyl-1*H*-imidazol-1-yl)pyridine in KBr.



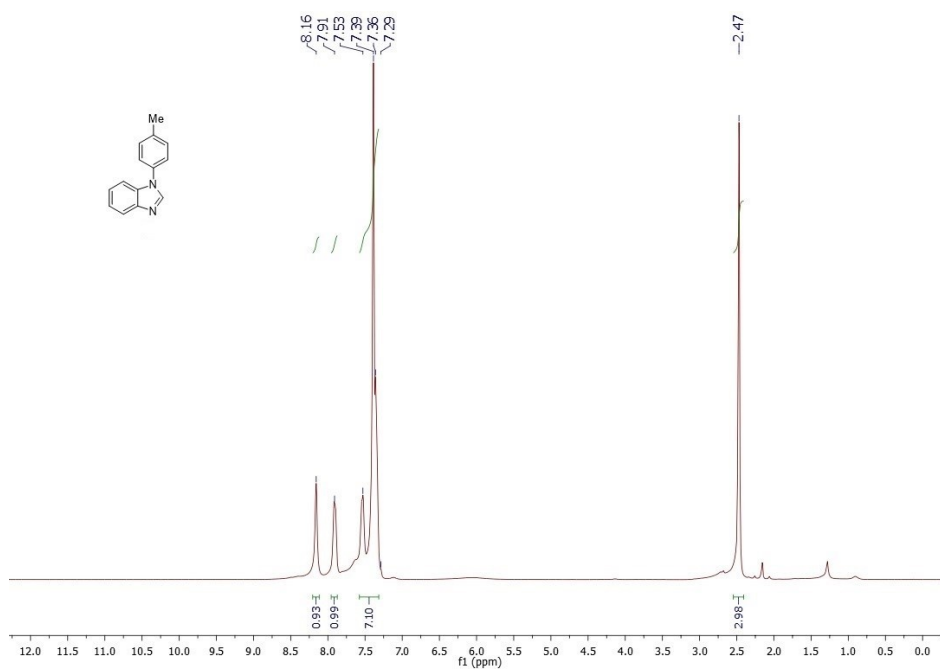

**Figure 16.**  $^1\text{H}$  NMR spectrum (300 MHz) of 1-(*p*-tolyl)-1*H*-benzo[*d*]imidazole in  $\text{CDCl}_3$ .

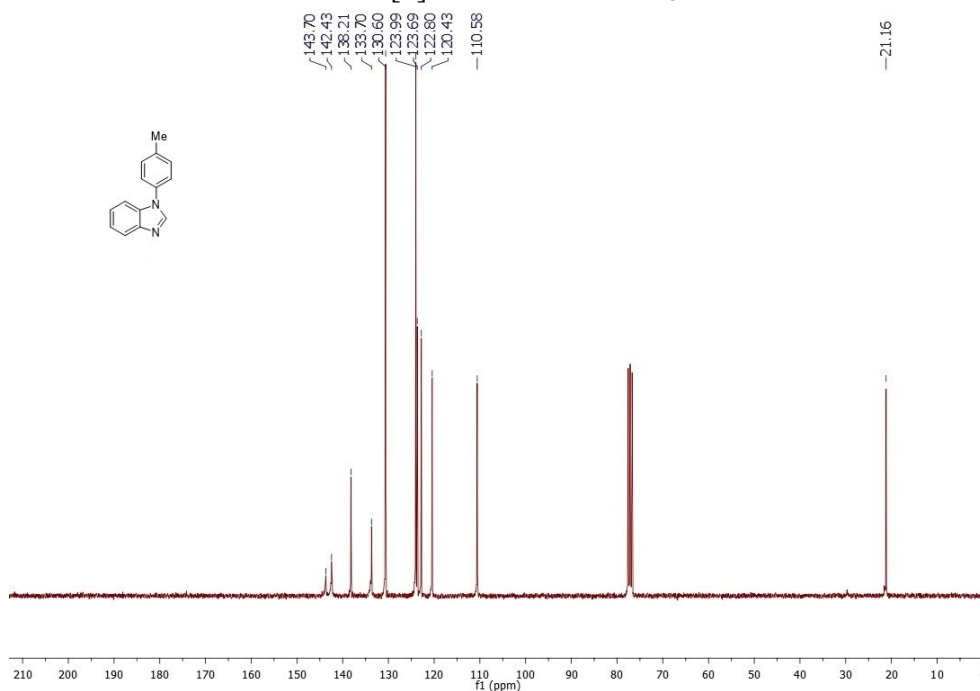

**Figure 17.**  $^{13}\text{C}$  NMR spectrum (75 MHz) of 1-(*p*-tolyl)-1*H*-benzo[*d*]imidazole in  $\text{CDCl}_3$ .

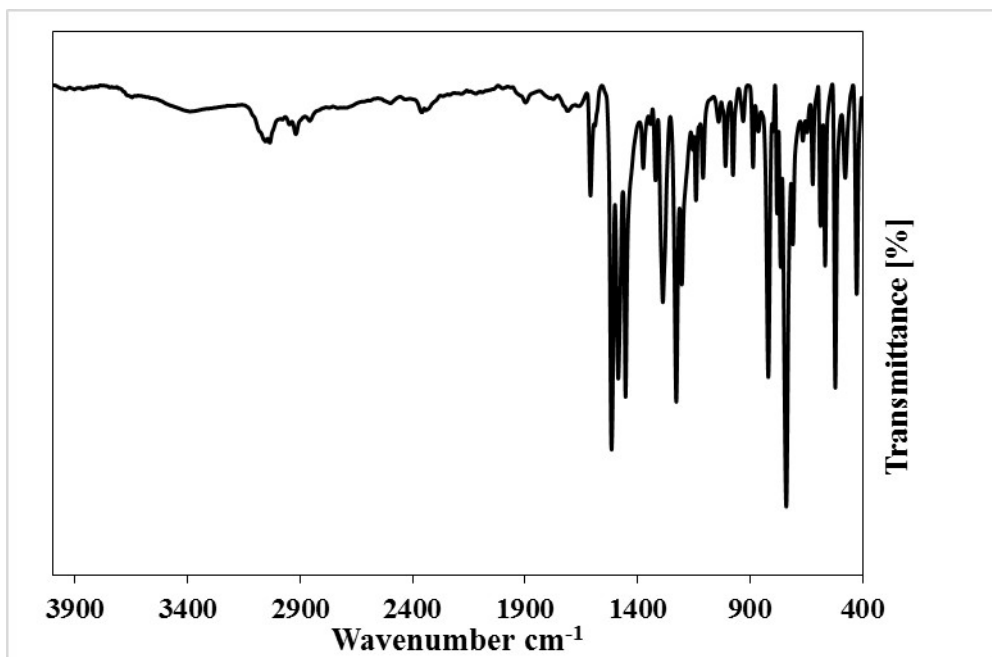

Figure 18. IR spectrum of 1-(*p*-tolyl)-1*H*-benzo[*d*]imidazole in KBr.

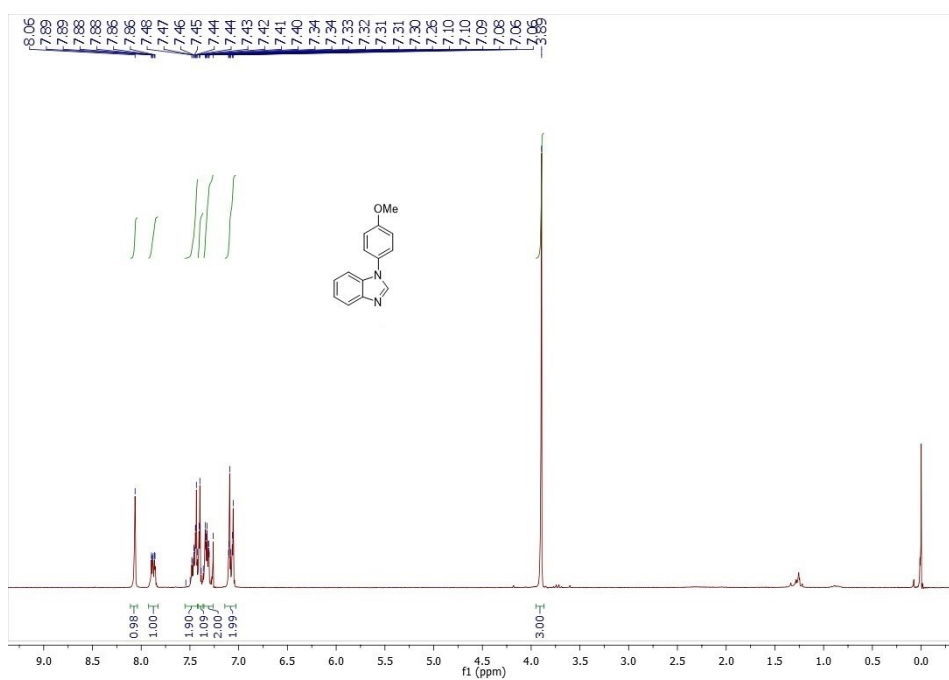

Figure 19.  $^1\text{H}$  NMR spectrum (250 MHz) of 1-(4-methoxyphenyl)-1*H*-benzo[*d*]imidazole in  $\text{CDCl}_3$ .

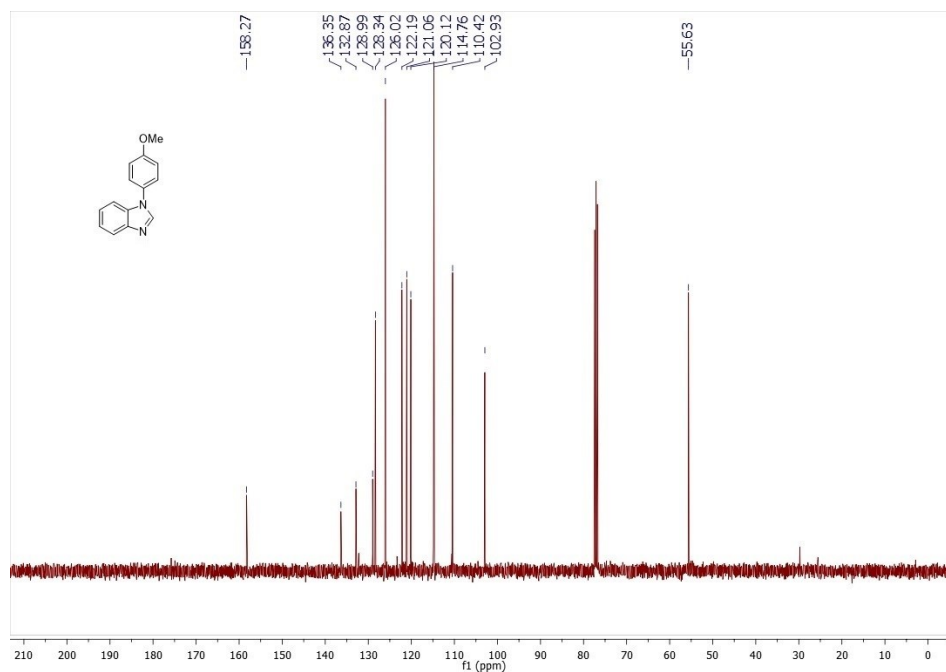

**Figure 20.**  $^{13}\text{C}$  NMR spectrum (101 MHz) of 1-(4-methoxyphenyl)-1*H*-benzo[*d*]imidazole in  $\text{CDCl}_3$ .

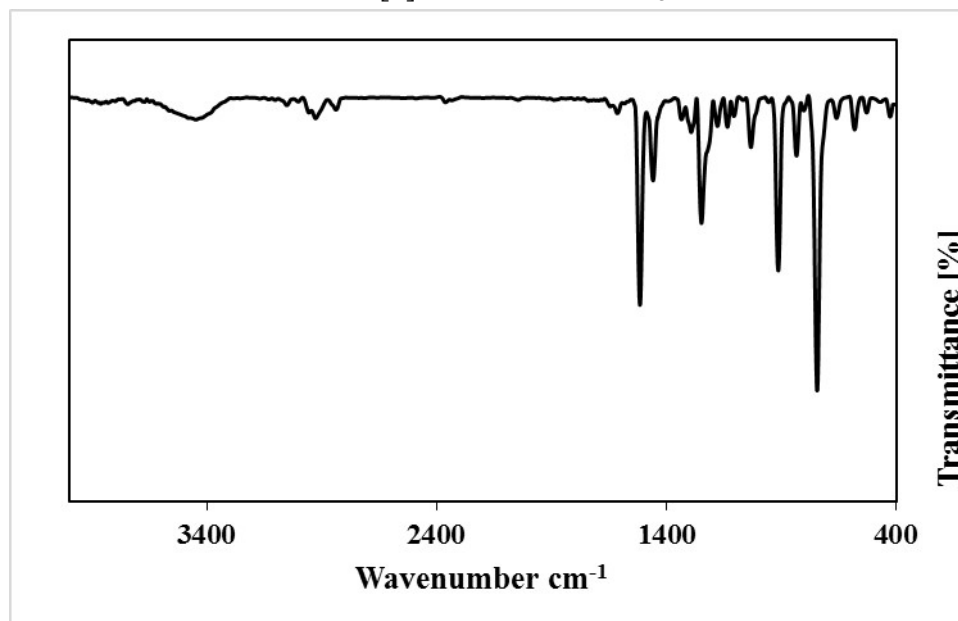

**Figure 21.** IR spectrum of 1-(4-methoxyphenyl)-1*H*-benzo[*d*]imidazole in KBr.

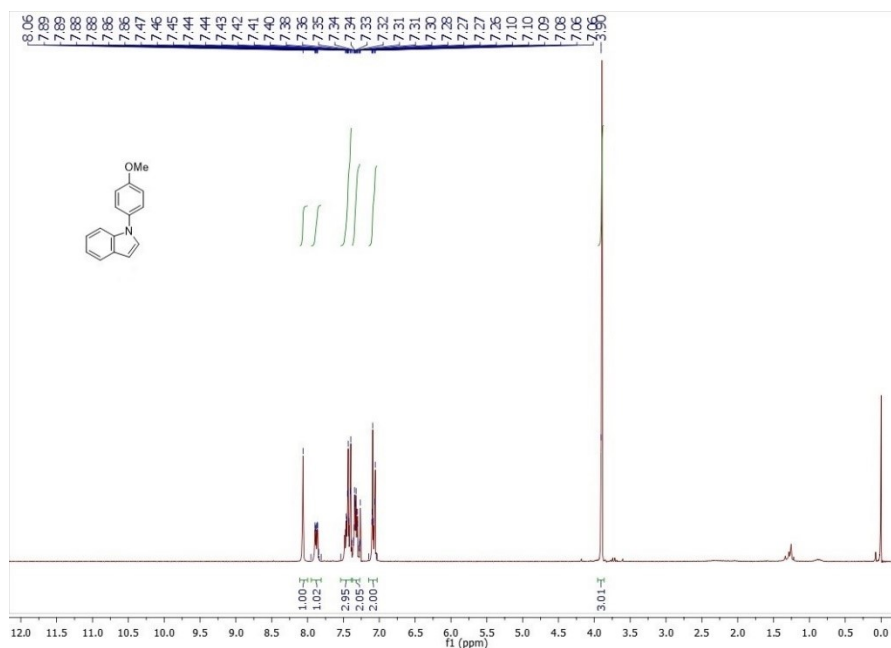

**Figure 22.**  $^1\text{H}$  NMR spectrum (250 MHz) of 1-(4-methoxyphenyl)-1H-indole in  $\text{CDCl}_3$ .

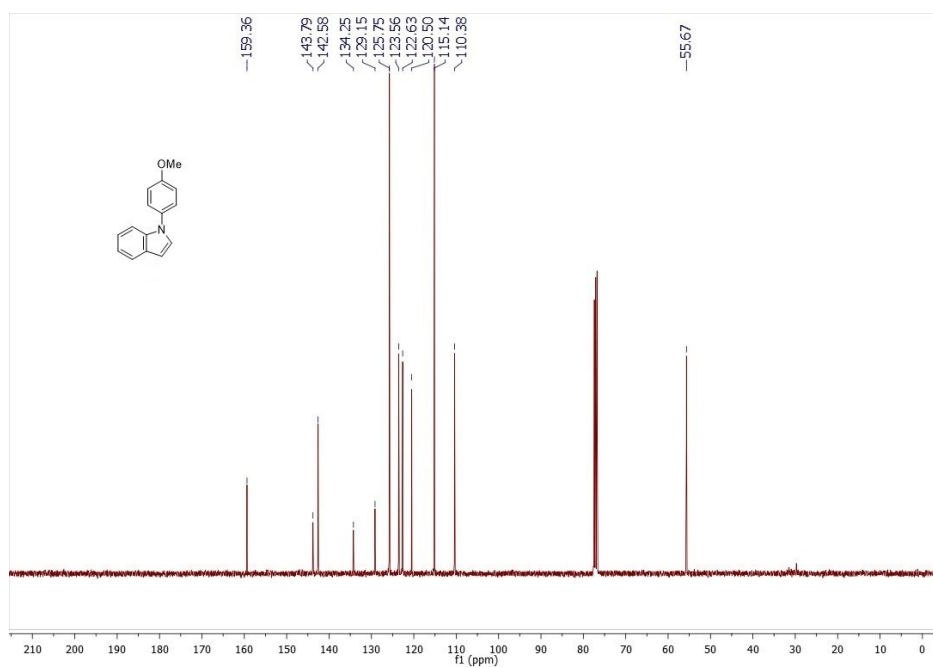

**Figure 23.**  $^{13}\text{C}$  NMR spectrum (101 MHz) of 1-(4-methoxyphenyl)-1H-indole in  $\text{CDCl}_3$ .

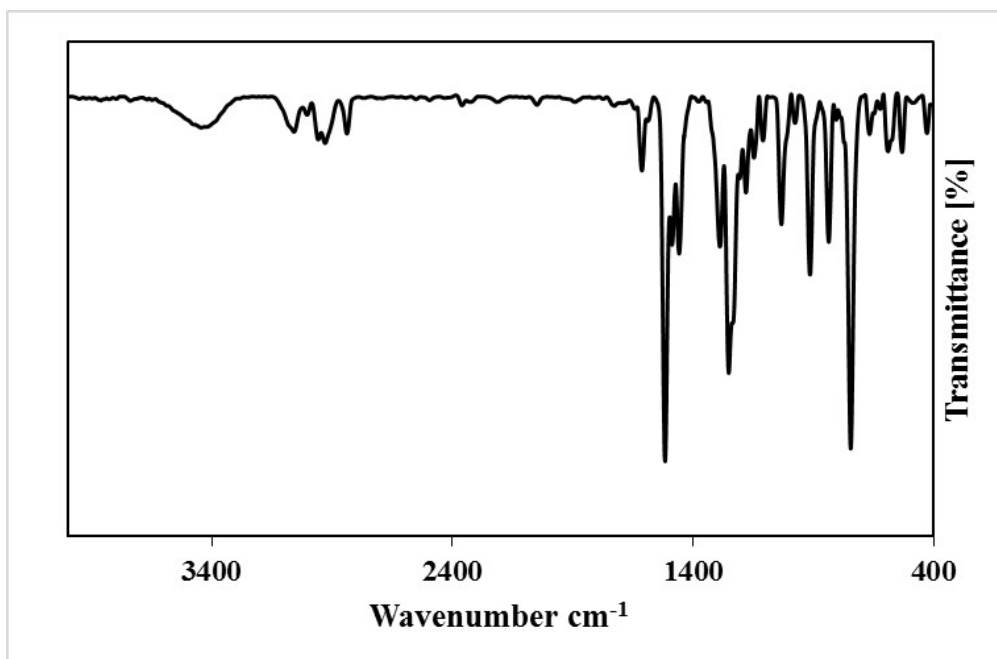

**Figure 24.** IR spectrum of 1-(4-methoxyphenyl)-1*H*-indole in KBr.

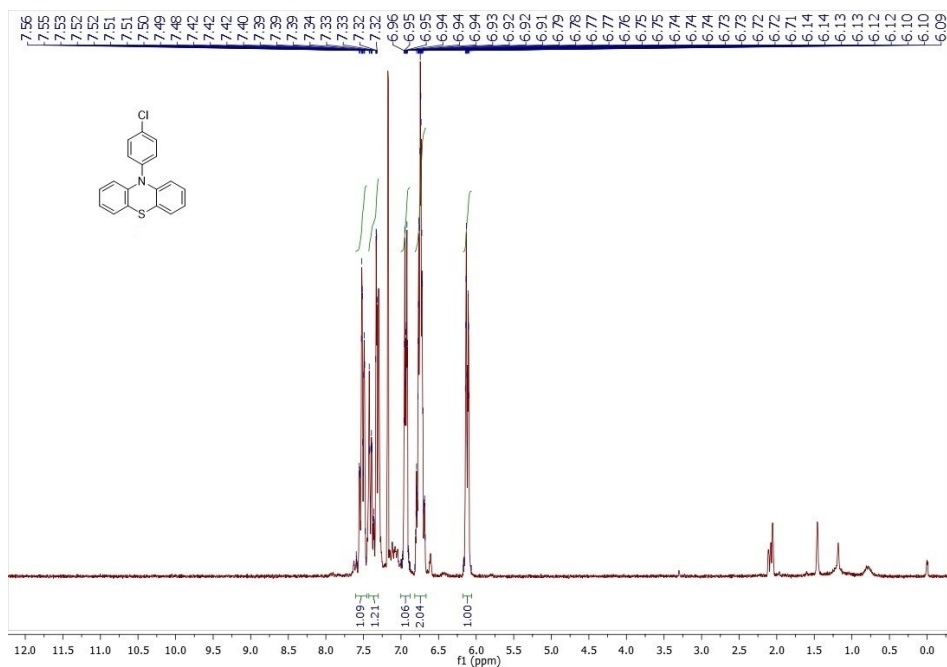

**Figure 25.**  $^1\text{H}$  NMR spectrum (250 MHz) of 10-(4-chlorophenyl)-10*H*-phenothiazine in  $\text{CDCl}_3$ .

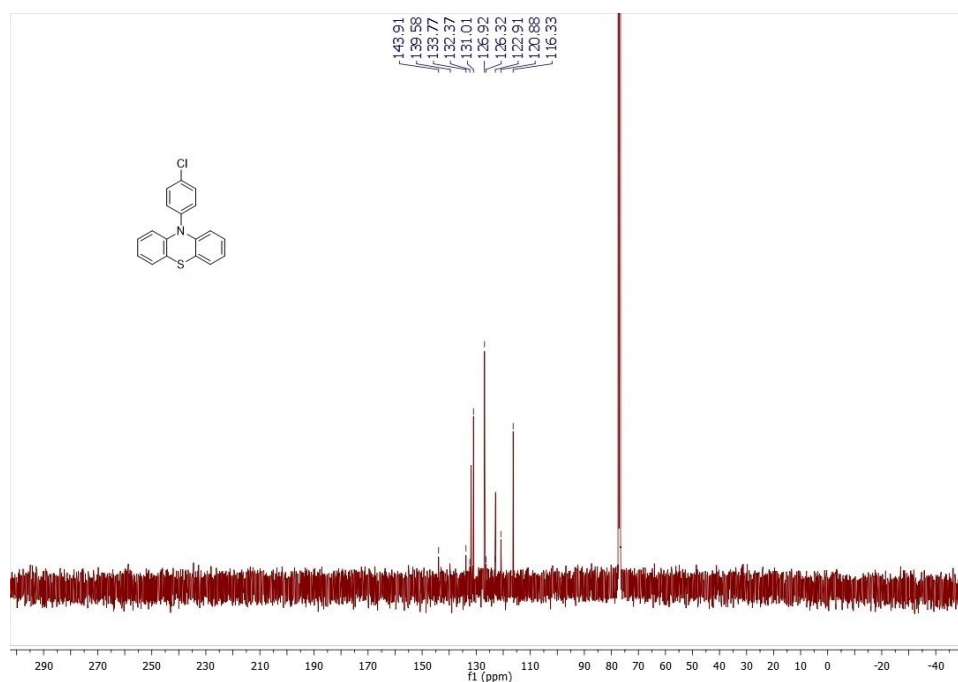

**Figure 26.** <sup>13</sup>C NMR spectrum (101 MHz) of 10-(4-chlorophenyl)-10*H*-phenothiazine in CDCl<sub>3</sub>.

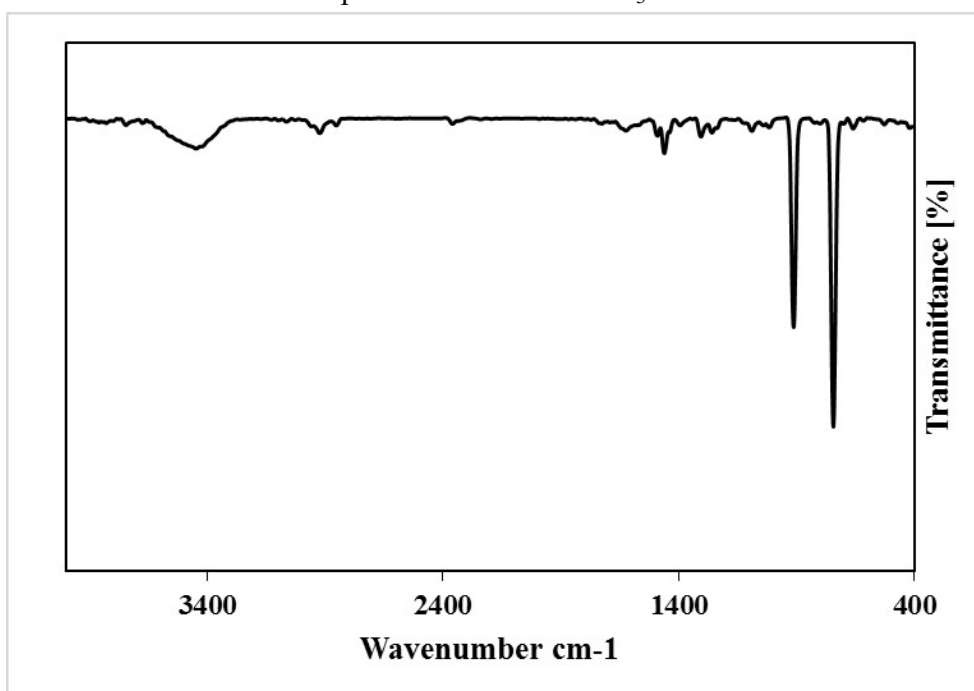

**Figure 27.** IR spectrum of 10-(4-chlorophenyl)-10*H*-phenothiazine in KBr.

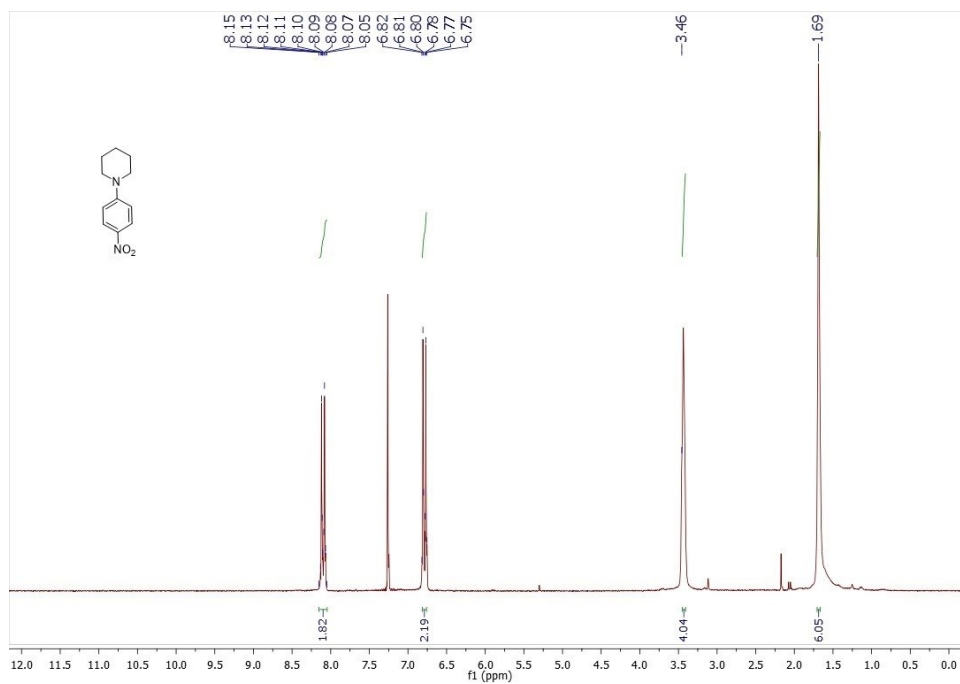

**Figure 28.**  $^1\text{H}$  NMR spectrum (250 MHz) of 1-(4-nitrophenyl)piperidine in  $\text{CDCl}_3$ .

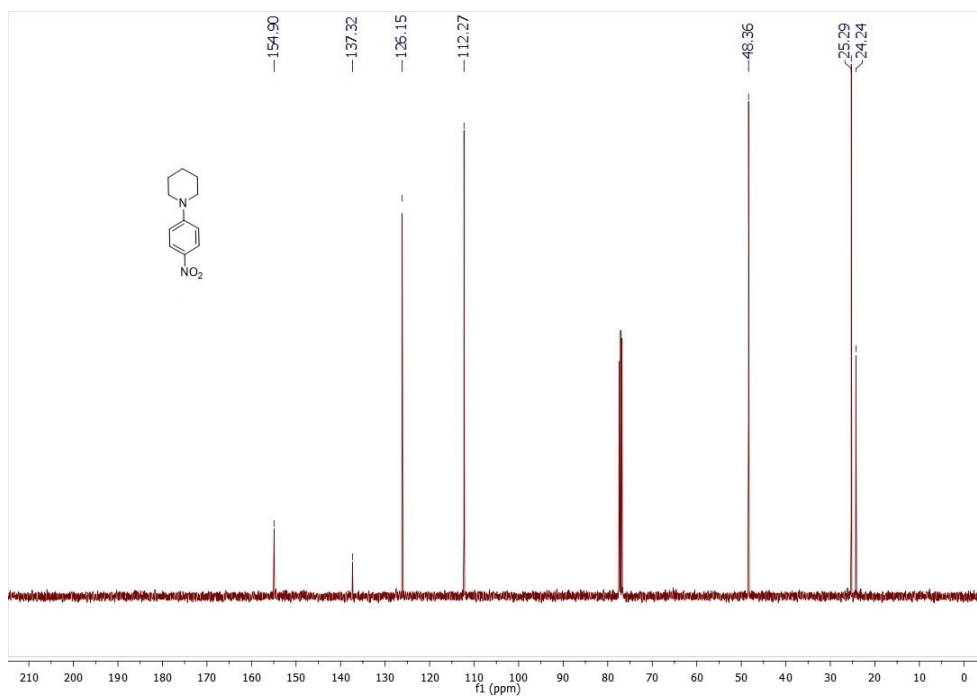

**Figure 29.**  $^{13}\text{C}$  NMR spectrum (101 MHz) of 1-(4-nitrophenyl)piperidine in  $\text{CDCl}_3$ .

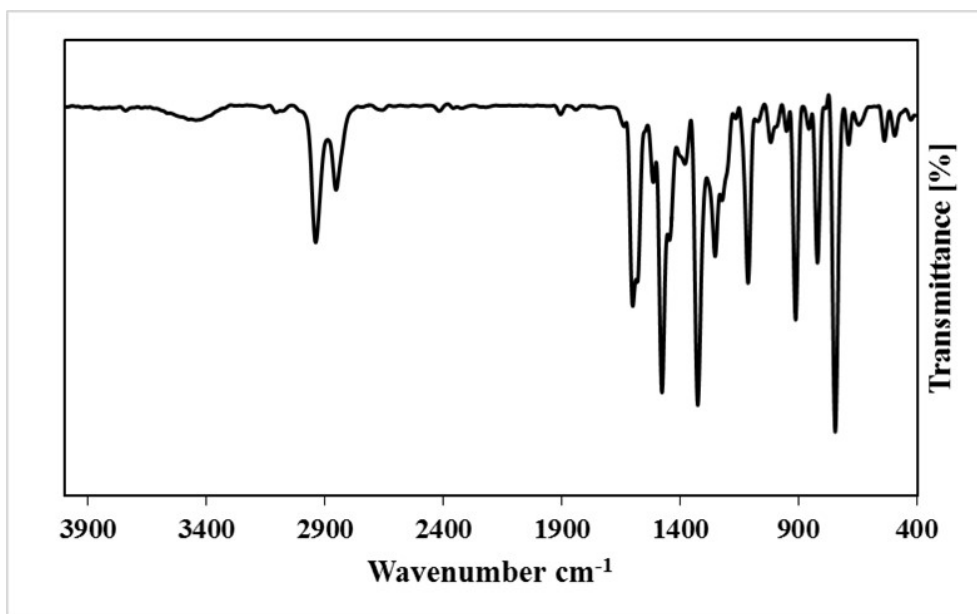

**Figure 30.** IR spectrum of 1-(4-nitrophenyl)piperidine in KBr.

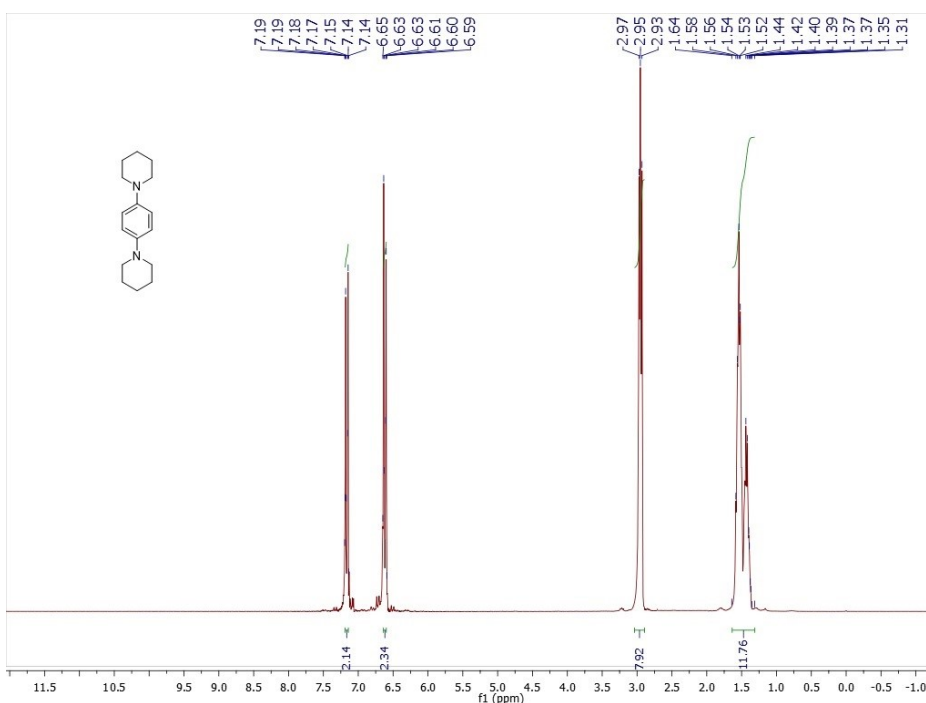

**Figure 31.**  $^1\text{H}$  NMR spectrum (250 MHz) of 1,4-di(piperidin-1-yl)benzene in  $\text{CDCl}_3$ .



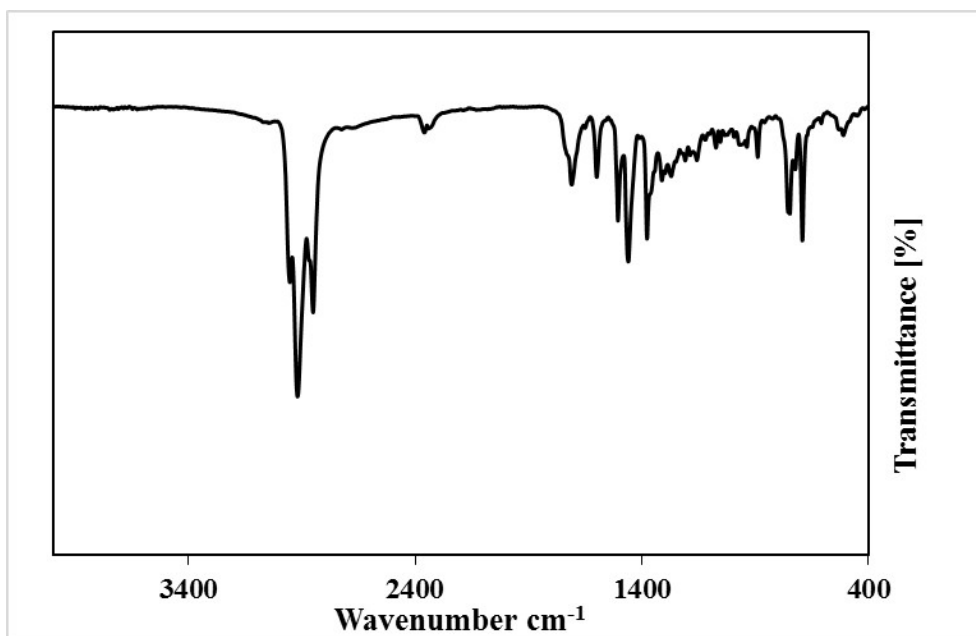

**Figure 32.** IR spectrum of 1,4-di(piperidin-1-yl)benzene in KBr.

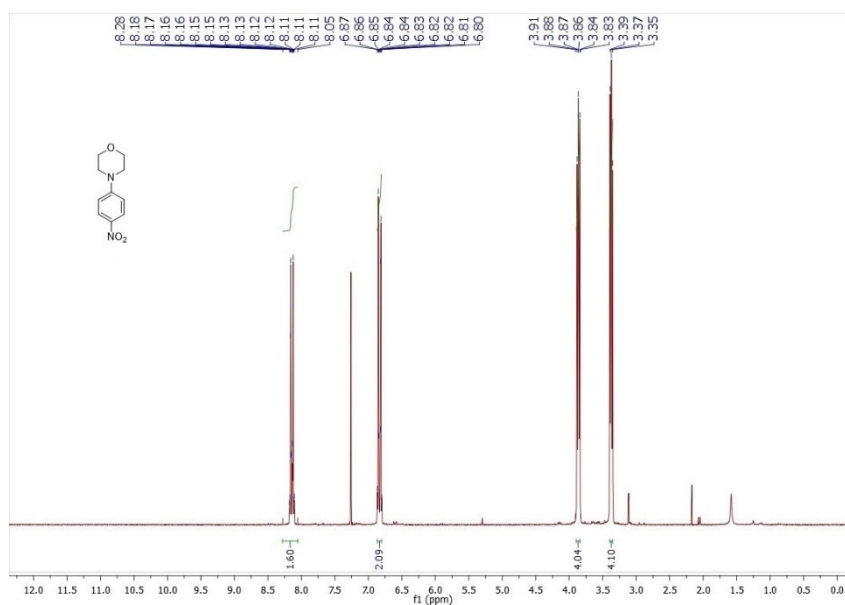

**Figure 33.**  $^1\text{H}$  NMR spectrum (250 MHz) of 4-(4-nitrophenyl)morpholine in  $\text{CDCl}_3$ .

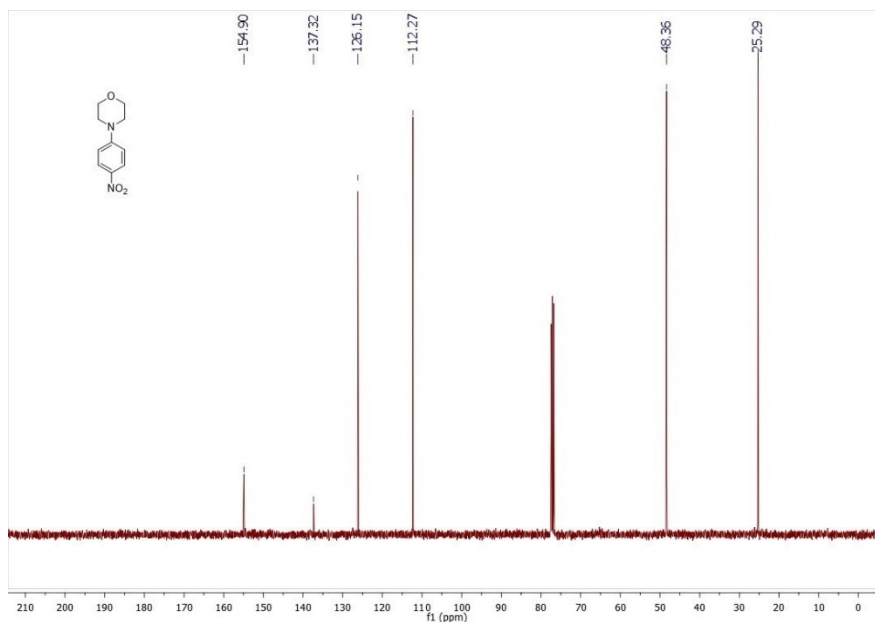

**Figure 34.**  $^{13}\text{C}$  NMR spectrum (101 MHz) of 4-(4-nitrophenyl)morpholine in  $\text{CDCl}_3$ .

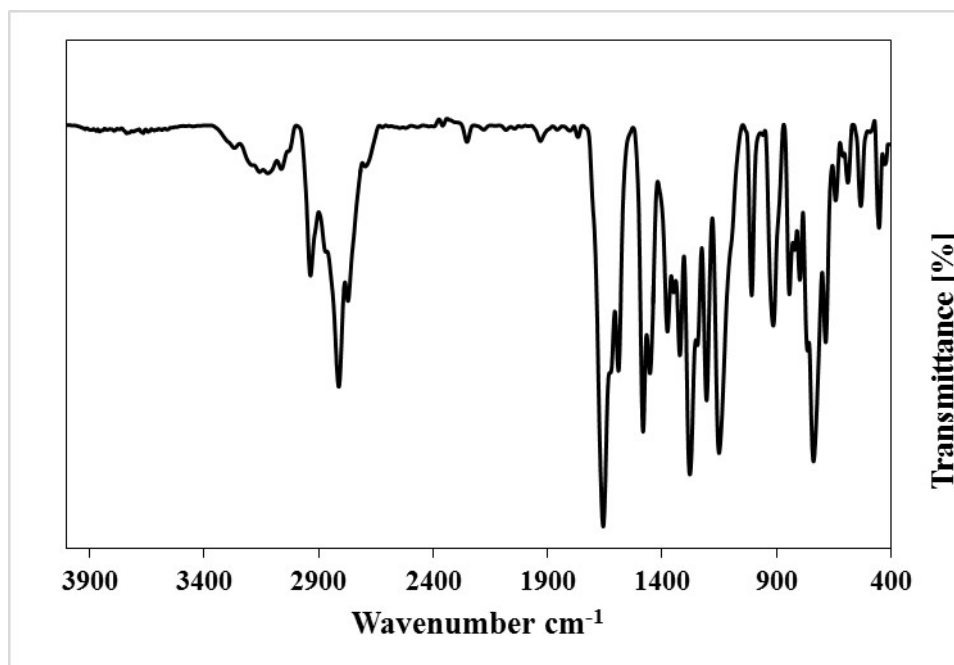

**Figure 35.** IR spectrum of 4-(4-nitrophenyl)morpholine in KBr.
